# Supplementary material
Source: MDPI journal article supplement (https://www.mdpi.com/2073-4441/15/12/2193)
Supplement: s1 [file s1]

## **The Comparison of Seven Models to Simulate the Transport and Deposition of Polydisperse Particles under Favorable Conditions in a Saturated Medium**

**Zhike Zou <sup>1</sup>, Lei Yu <sup>1</sup>, Yalong Li <sup>1,\*</sup>, Shuyao Niu <sup>2</sup>, Linlin Fan <sup>1</sup>, Wenbing Luo <sup>1</sup> and Wei Li <sup>1</sup>**

<sup>1</sup> Agricultural Water Conservancy Department, Changjiang River Scientific Research Institute, Wuhan 430010, China; zz971278375@163.com (Z.Z.); ylei2833@163.com (L.Y.); fl1901023@163.com (L.F.); luowenbing2005\_0@126.com (W.L.); li-wei13@tsinghua.org.cn (W.L.)

<sup>2</sup> College of Hydrology and Water Resource, Hohai University, Nanjing 210098, China; n1148603335@163.com

\* Correspondence: lyalong888@163.com; Tel.: +86-027-82828793

**Table S1: Summary of dimensionless parameters present in the existing models.**

| Parameter            | Definition <sup>a</sup>                                             | Value Range                                          | Physical Interpretation                                                                                                                                |
|----------------------|---------------------------------------------------------------------|------------------------------------------------------|--------------------------------------------------------------------------------------------------------------------------------------------------------|
| Advection            | $U$                                                                 | 0-10 <sup>-7</sup> m/s                               | fluid approach velocity                                                                                                                                |
| Diffusion            | $D = \frac{AT}{6\pi\mu a_p}$                                        | 10 <sup>-9</sup> -10 <sup>-6</sup> m <sup>2</sup> /s | bulk diffusion                                                                                                                                         |
| London group         | $N_{Lo} = \frac{H}{9\pi\mu U a_p^2}$                                | 10 <sup>-7</sup> -10 <sup>-3</sup>                   | attraction number                                                                                                                                      |
| Attraction number    | $N_A = \frac{H}{12\pi\mu U a_p^2}$                                  | 10 <sup>-8</sup> -10 <sup>-3</sup>                   | attraction number; represents combined influence of van der Waals attraction forces and fluid velocity on particle deposition rate due to interception |
| Gravity              | $V = \frac{2}{9} \frac{a_p^2(\rho_p - \rho)}{\mu} g$                | 0-10 <sup>-5</sup> m/s                               | gravity number; ratio of Stokes particle settling velocity to approach velocity of the fluid                                                           |
| Van der Waals number | $N_{vdW} = \frac{H}{AT}$                                            | 10 <sup>-1</sup> -10 <sup>1</sup>                    | van der Waals number characterizing ratio of van der Waals interaction energy to the particle's thermal energy                                         |
| Peclet number        | $N_{pe} = \frac{2a_c U}{D}$                                         | 10 <sup>-1</sup> -2.37×10 <sup>5</sup>               | Peclet number characterizing ratio of convective transport to diffusive transport                                                                      |
| Gravity number       | $N_G = \frac{V}{U}$                                                 | 0-10 <sup>2</sup>                                    | Gravity number                                                                                                                                         |
|                      | $N_{Gi} = \frac{N_G}{1 + N_G}$                                      | 10 <sup>-4</sup>                                     | Modified gravity number                                                                                                                                |
| Aspect ratio         | $N_R = \frac{a_p}{a_c}$                                             | 0-10 <sup>-3</sup>                                   | aspect ratio                                                                                                                                           |
| $A_s$                | $A_s = \frac{1(1 - \gamma^5)}{2 - 3\gamma + 3\gamma^5 - 2\gamma^6}$ | 2-7.15                                               | Porosity dependant variable                                                                                                                            |
| $\gamma$             | $\gamma = (1 - \varepsilon)^{1/3}$                                  | 0.60-0.80                                            | Porosity dependant variable                                                                                                                            |

<sup>a</sup> The parameters in the various dimensionless groups are as follows:  $d_p$  is the particle diameter, 2.932×10<sup>-6</sup> m,  $a_p$  is particle radius, 1.466×10<sup>-6</sup> m,  $d_c$  is the collector diameter, 5.03×10<sup>-4</sup> m,  $a_c$  is collector radius, 2.51×10<sup>-4</sup> m,  $U$  is the fluid approach velocity, 3.51×10<sup>-5</sup> m/s,  $D$  is the bulk diffusion coefficient, 2.31×10<sup>-6</sup> m<sup>2</sup>/s,  $H$  is the Hamaker constant, 10<sup>-20</sup>J,  $A$  is the Boltzmann constant, 1.38×10<sup>-23</sup>,  $T$  is fluid absolute temperature, 298K,  $\varepsilon$  is the porosity, 0.378,  $\rho_p$  is the particle density, 2.53×10<sup>3</sup> kg/m<sup>3</sup>,  $\rho$  is the fluid density, 1000 kg/m<sup>3</sup>,  $\mu$  is the absolute fluid viscosity, 9.8×10<sup>-4</sup> Pa·s, and  $g$  is the gravitational acceleration, 9.806 m/(s\*s).

**Table S2:** List of the existing equations for comparison. See Table S1 for the parameter's definition.

| Acronym | Authors                                                                                      | Equation                                                                                                                                                                                                                                            |
|---------|----------------------------------------------------------------------------------------------|-----------------------------------------------------------------------------------------------------------------------------------------------------------------------------------------------------------------------------------------------------|
| Yao     | Yao et al. 1971                                                                              | $\eta_0 = 4.04N_{Pe}^{-2/3} + \frac{3}{2}N_R^2 + N_G$                                                                                                                                                                                               |
| RT      | Rajagopalan and Tien 1976<br>Corrected by Logan <b>Error!</b><br>Reference source not found. | $\eta_{0,\gamma} = \gamma^2[4.04N_{Pe}^{-\frac{2}{3}}A_S^{\frac{1}{3}} + A_SN_R^{\frac{15}{8}}N_{Lo}^{\frac{1}{8}} + 0.00338A_SN_G^{1.2}N_R^{-0.4}]$                                                                                                |
| TE      | Tufenkji and Elimelech 2004<br><b>Error! Reference source not found.</b>                     | $\eta_0 = 2.4N_R^{-0.081}N_{Pe}^{-0.715}A_S^{\frac{1}{3}}N_{vdW}^{0.052} + 0.55A_SN_R^{1.675}N_A^{0.125}$<br>$+ 0.22A_SN_G^{1.11}N_R^{-0.24}N_{vdW}^{0.053}$                                                                                        |
| MPFJ    | Ma et al. 2009                                                                               | $\eta_{0,\gamma} = \gamma^2[2.3N_{Pe}^{-0.65}A_S^{\frac{1}{3}}N_R^{-0.08}N_A^{0.052} + 0.55A_SN_R^{1.8}N_A^{0.15}$<br>$+ 0.2N_G^{1.1}N_R^{-0.1}N_A^{0.053}N_{Pe}^{0.053}]$                                                                          |
| NG      | Nelson and Ginn 2011                                                                         | $\eta_{0,\gamma} = \gamma^2[2.4N_{Pe}^{-0.68}A_S^{\frac{1}{3}}N_{Gi}^{0.8}N_{Lo}^{0.015}(\frac{N_{Pe}}{N_{Pe} + 16})^{0.75} + A_SN_R^{\frac{15}{8}}N_{Lo}^{\frac{1}{8}}$<br>$+ 0.7N_GN_R^{-0.05}(\frac{N_{Gi}}{N_{Gi} + 0.9})]$                     |
| MHJ     | Ma et al. 2013                                                                               | $\eta_{0,\gamma} = \gamma^2[N_R^{0.028}N_{Gi}^{0.8}N_{Lo}^{0.015}(\frac{8 + 4(1 - \gamma)A_S^{1/3}N_{Pe}^{1/3}}{8 + (1 - \gamma)N_{Pe}^{0.97}})$<br>$+ A_SN_R^{\frac{1}{8}}N_{Lo}^{\frac{15}{8}} + 0.7N_GN_R^{-0.05}(\frac{N_{Gi}}{N_{Gi} + 0.9})]$ |
| MMS     | Messina et al. 2015                                                                          | $\eta_0 = \frac{(\eta_{0,a_c})^b}{(I)^c}$                                                                                                                                                                                                           |

b:  $\eta_{0,a_c} = [1.5062A_SN_R^{1.9834} + N_G(1 + 6.0187N_R^2) + N_{Pe}^{-1}\frac{7.5609+4.9534N_R^1}{2-2\gamma} + A_S^{0.1259}N_G^{0.8741}(0.0442 +$   
 $0.122N_R^{0.421}) + A_S^{0.3662}N_{Pe}^{-0.6338}(2.9352 + 2.748N_R^{0.3737}) +$   
 $N_G^{0.8741}N_{Pe}^{-0.345}(0.9461+1.1626N_R^{0.6012})+ A_S^{0.1562}N_G^{0.5873}N_{Pe}^{-0.2565}(-0.674 - 0.7119N_R^{0.5438})$

c:  $I = [(1 + A_S^{6.0098}N_R^{1.9834}) + N_G(1 + 6.0187N_R^2) + (1 - \sqrt{1 - \gamma^2})N_{Pe}^{-1}\frac{7.5609+4.9534N_R^1}{2-2\gamma} +$   
 $A_S^{0.1259}N_G^{0.8741}(0.0442 + 0.122N_R^{0.421}) + A_S^{0.3662}N_{Pe}^{-0.6338}(2.9352 + 2.748N_R^{0.3737}) +$   
 $N_G^{0.6550}N_{Pe}^{-0.345}(2.7972+3.4372N_R^{0.6012})+ A_S^{0.1562}N_G^{0.5873}N_{Pe}^{-0.2565}(-1.1945 - 1.2616N_R^{0.5438})$
